# Supplementary material for: Mesoporous Magnetic Cysteine Functionalized Chitosan Nanocomposite for Selective Uranyl Ions Sorption: Experimental, Structural Characterization, and Mechanistic Studies
Source: MDPI journal article supplement (doi:10.3390/polym14132568), 2022-06-24
Supplement: s1 [file s1]

# **Mesoporous Magnetic Cysteine Functionalized Chitosan Nanocomposite for Selective Uranyl Ions Sorption: Experimental, Structural Characterization, and Mechanistic Studies**

**Ahmed A. Al-Ghamdi <sup>1</sup>, Ahmed Galhoum <sup>2</sup> Ahmed Alshahrie <sup>1,3</sup>, Yusuf A. Al-Turki <sup>4</sup>, Amal M. Al-Amri <sup>5</sup>, S. Wageh <sup>1,\*</sup>**

<sup>1</sup>King Abdulaziz University, Faculty of Science, Department of Physics, Jeddah, Saudi Arabia; agamdi@kau.edu.sa

<sup>2</sup>Nuclear Materials Authority, P.O. Box 530, El-Maadi, Cairo, Egypt; Galhoum\_nma@yahoo.com

<sup>3</sup>Centre of Nanotechnology, King Abdul-Aziz University, Jeddah, Saudi Arabia; aalshahri@kau.edu.sa

<sup>4</sup>King Abdulaziz University, Faculty of Engineering, Computer and Electrical Engineering Department, Jeddah, Saudi Arabia; yaturki@yahoo.com

<sup>5</sup>King Abdulaziz University, Faculty of Science & Arts, Physics Department, Rabigh, Saudi Arabia; amsalamri@kau.edu.sa

\* Correspondence: wswelm@kau.edu.sa; (S. Wageh)

**Supporting Information section**

**Table S1.** Adsorption modeling Equations: kinetics and isotherms [1, 2]

| Process   | Model                     | Equation                                                                                                                                                                                                            | Parameters                                              |                                                    |
|-----------|---------------------------|---------------------------------------------------------------------------------------------------------------------------------------------------------------------------------------------------------------------|---------------------------------------------------------|----------------------------------------------------|
| Kinetics  | PFORE                     | $q(t) = q_{eq,1}(1 - e^{k_1 t})$                                                                                                                                                                                    | $q_{eq,1}$<br>(mmol <sup>U</sup> /g)                    | $k_1$<br>(min <sup>-1</sup> )                      |
|           | PSORE                     | $q(t) = \frac{q_{eq,2}^2 \times k_2 \times t}{1 + q_{eq,2} \times k_2 \times t}$                                                                                                                                    | $q_{eq,2}$<br>(mmol <sup>U</sup> /g <sup>-1</sup> )     | $k_2$<br>(L mmol <sup>-1</sup> min <sup>-1</sup> ) |
|           | sRIDE<br>(Weber & Morris) | $q_{(t)} = k_{int,i} \cdot t^{0.5} + C$<br><br>Several linear sections corresponding to different regimes of resistance (i) to intraparticle diffusion may co-exist ( $K_{int,i}$ ) (linear regression calculation) | $K_{int,i}$ (mmol g <sup>-1</sup> min <sup>-0.5</sup> ) |                                                    |
| Isotherms | Langmuir                  | $\frac{C_{eq}}{q_{eq}} = \frac{C_{eq}}{q_{max}} + \frac{1}{b q_{max}}$                                                                                                                                              | $q_{max}$<br>(mmol <sup>U</sup> /g)                     | $b_L$<br>(L/mmol)                                  |
|           | Freundlich                | $q = k_F C_{eq}^{1/n}$                                                                                                                                                                                              | $k_F$                                                   | $N$<br>(dimensionless)                             |
|           | Temkin                    | $q_{eq} = B_T \ln C_{eq} + B_T \ln A_T$<br><br>Where, $B_T = \frac{RT}{b_T}$                                                                                                                                        | $A_T$<br>(L/mmol)                                       | $b_T$<br>(J/mol)                                   |

**Figure S1.** XPS core level spectra for C 1s, O 1s, N 1s, P 2p, Fe 2p, and U 4f for Cys-sorbent before and after  $\text{UO}_2^{2+}$  sorption.

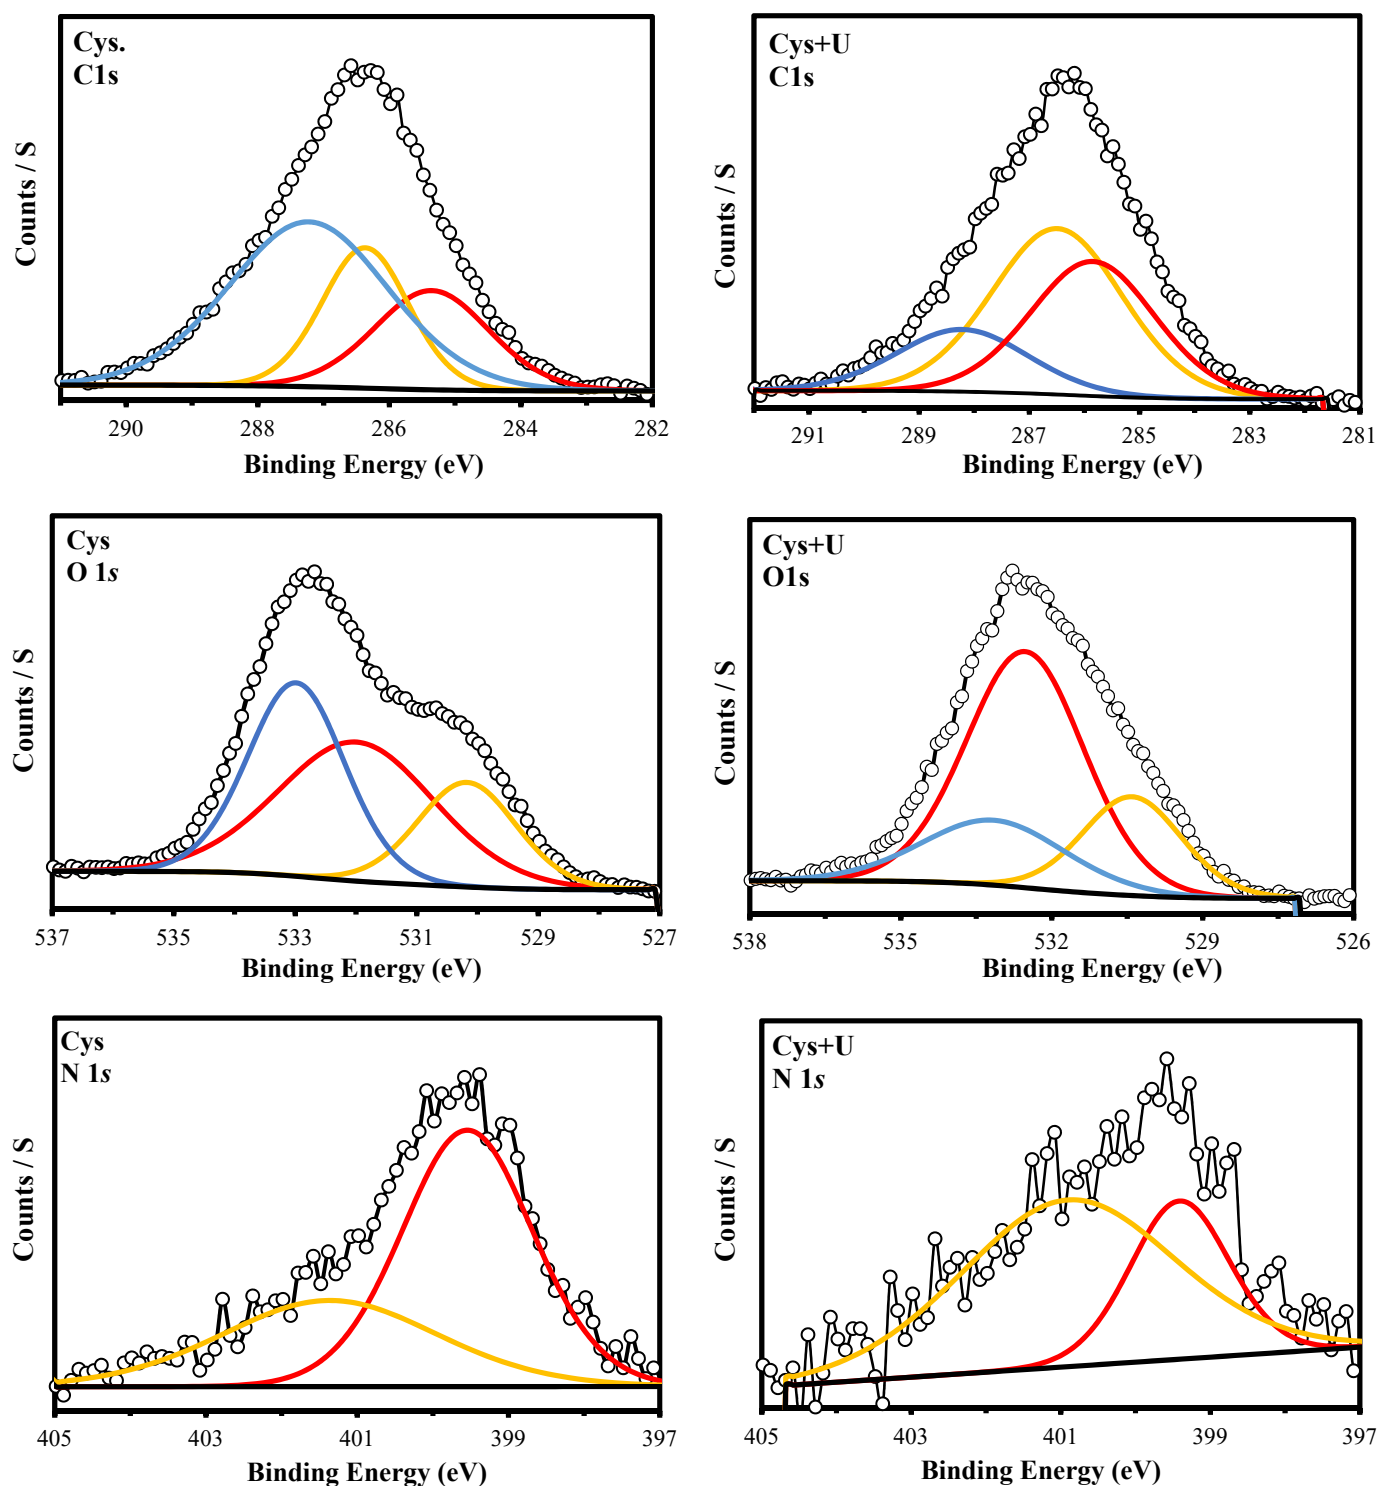

Figure S1. (cont.)

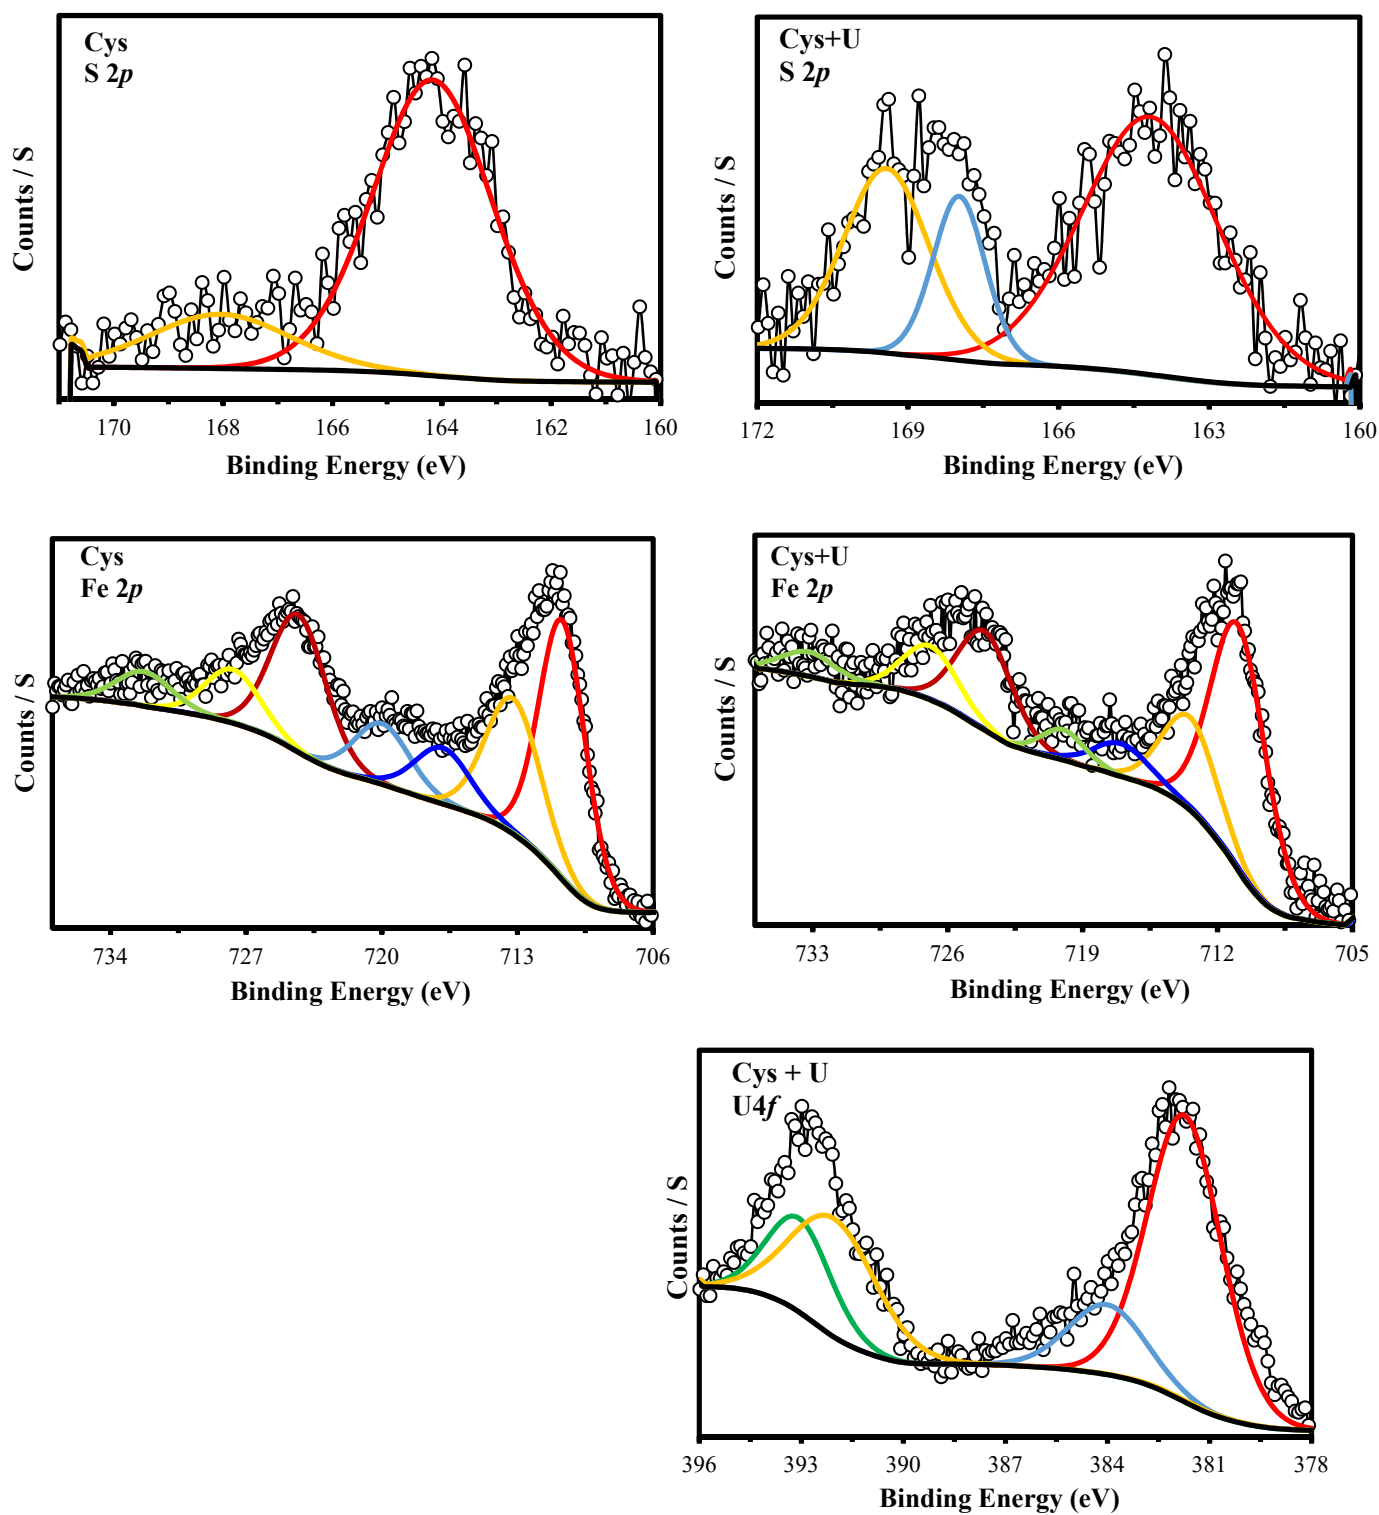

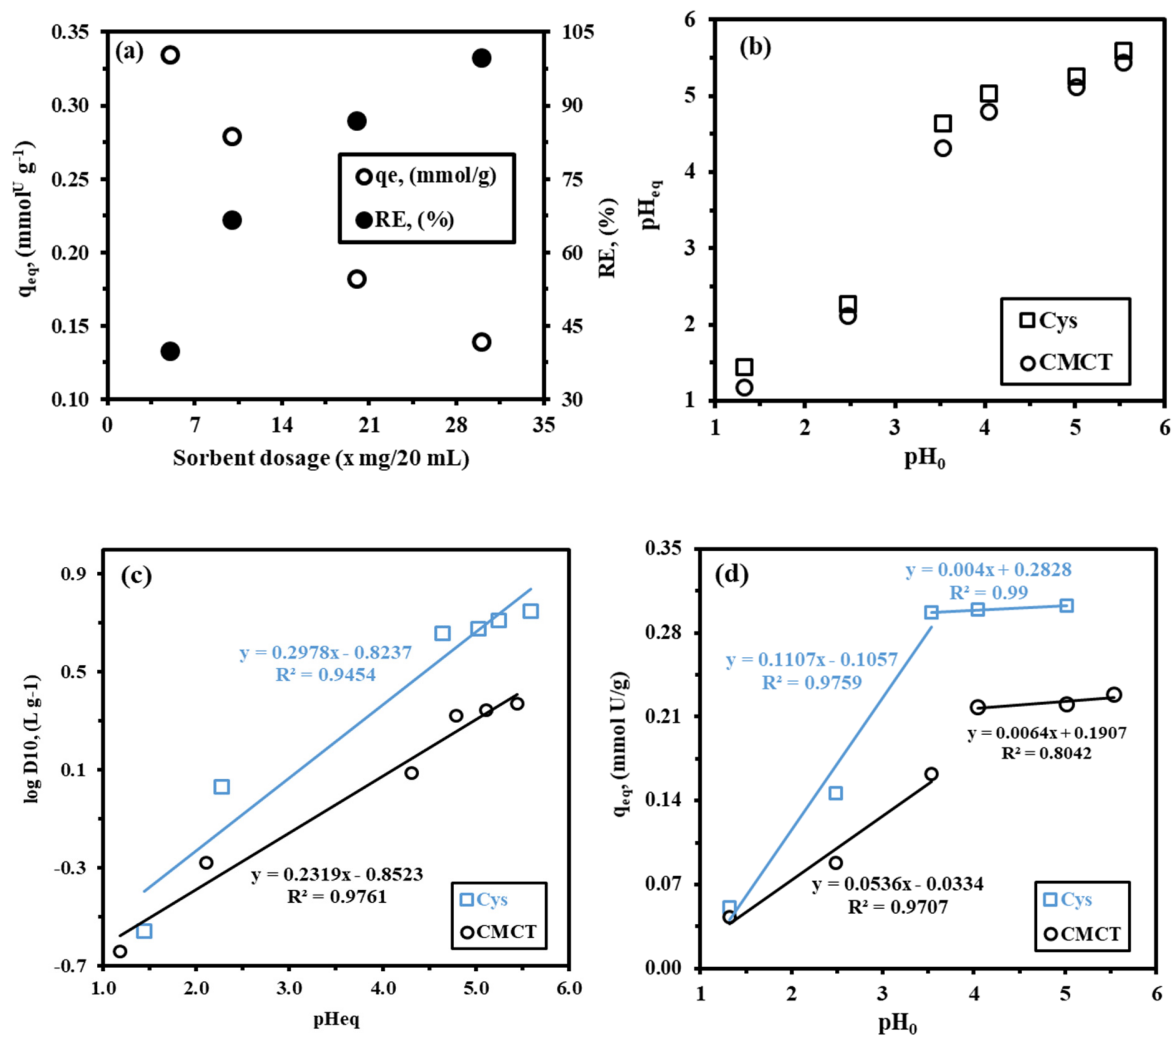

**Figure S2.** Effect of sorbent dosage (a), Plot of  $\text{pH}_0$  vs.  $\text{pH}_{\text{eq}}$  (b),  $\log_{10}D$  plot vs.  $\text{pH}_{\text{eq}}$  (c), and plot of  $\text{pH}_0$  vs.  $q_{\text{eq}}$  (d) for  $\text{UO}_2^{2+}$  sorption.

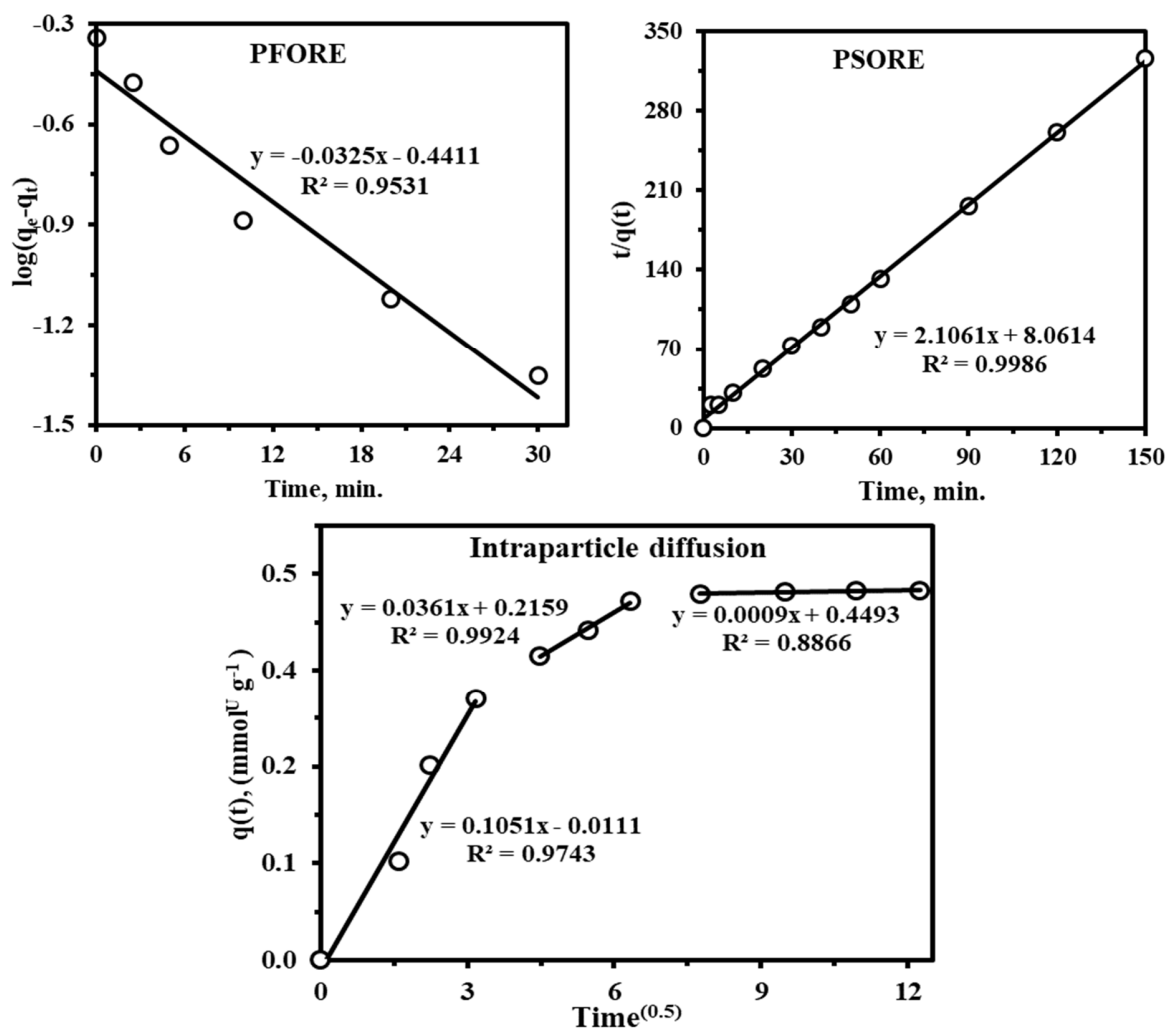

**Figure S3.** Sorption kinetics for PFORE, PSORE, and Intraparticle diffusion. ( $C_0$ : 0.425 mmol U/L, SD: 0.5g/L, time 60 min., room temp. 298 K)

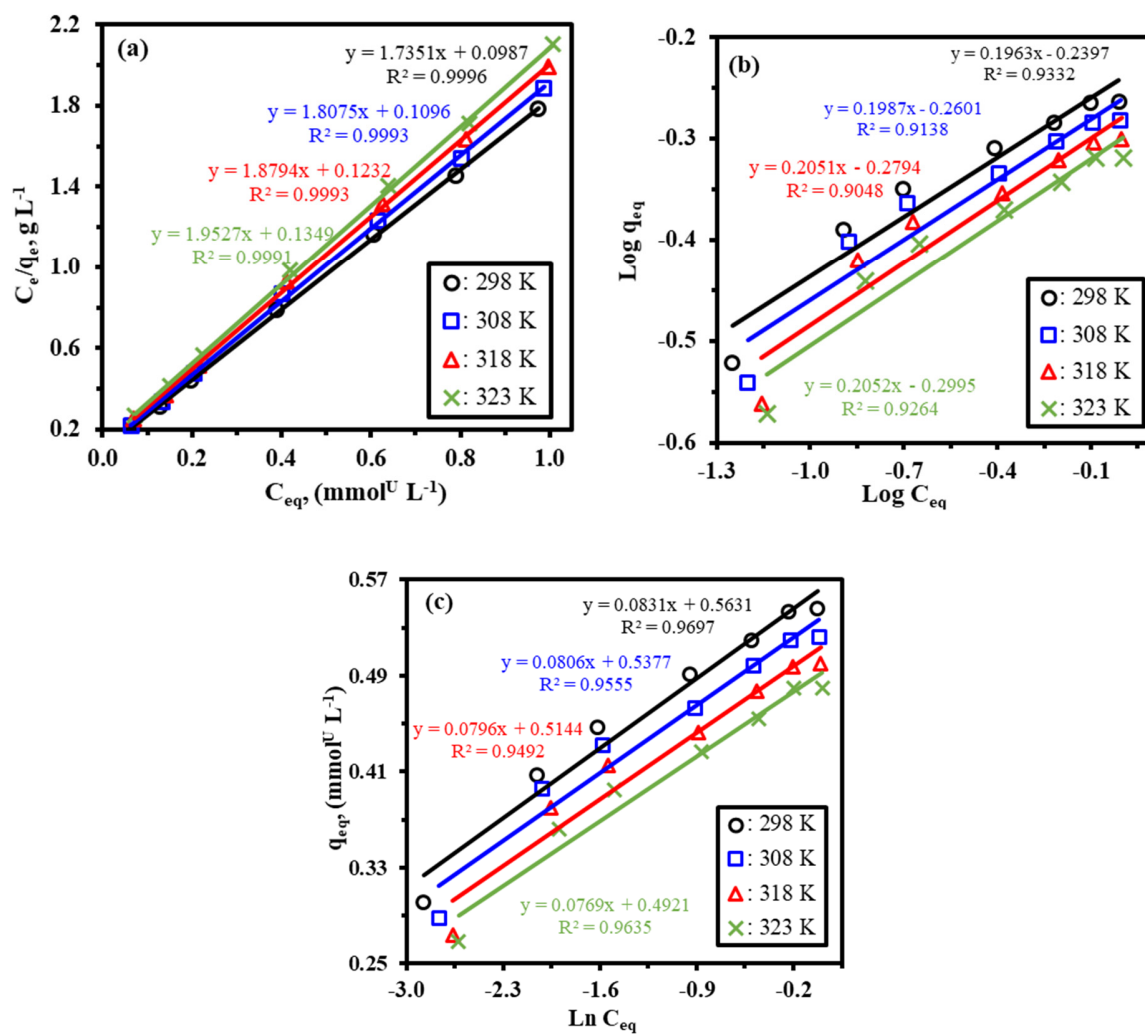

**Figure S4.** Linearization plots of Langmuir (a), Freundlich (b), and Timken isotherm (c): for  $\text{UO}_2^{2+}$  sorption. (pH: 4.0, SD: 0.5 g L $^{-1}$ ,  $C_0$ : 0.21–1.26 mmol U/L; T: 298–328 K, Time: 60 min.).

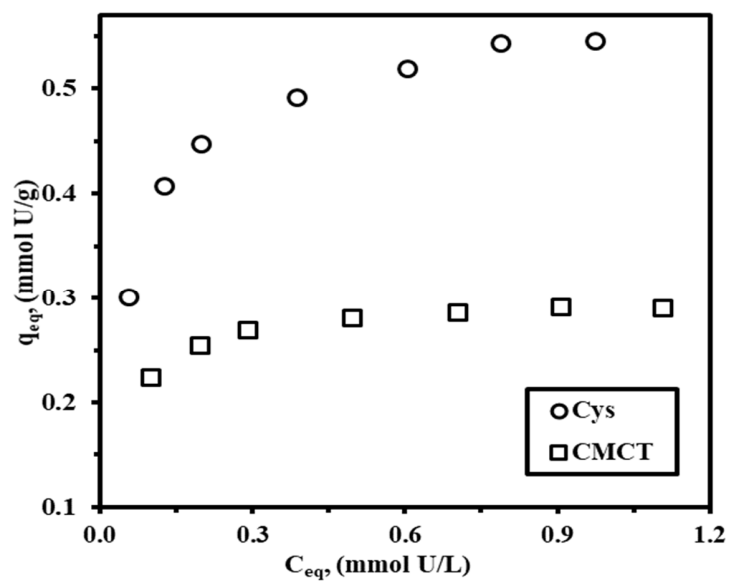

**Figure S5.** Sorption isotherm using both CMCT and Cys nanocomposites for  $UO_2^{2+}$  sorption. (pH: 4.0, SD: 0.5 g/L,  $C_0$ : 0.21–1.26 mmol U/L, T: 298–328 K, Time: 60 min for Cys and 180 min for CMCT).

#### References

- [1] X. Hu, C. Chen, D. Zhang, Y. Xue, Kinetics, isotherm and chemical speciation analysis of Hg(II) adsorption over oxygen-containing MXene adsorbent, *Chemosphere* 278 (2021) 130206.
- [2] C. Tien, *Adsorption calculations and modeling*, Butterworth-Heinemann, Boston, 1994.
